# Supplementary material for: Butyrate Improves the Metabolic Disorder and Gut Microbiome Dysbiosis in Mice Induced by a High-Fat Diet
Source: Front Pharmacol. 2019 Sep 13;10:1040. doi: 10.3389/fphar.2019.01040 (PMC6761375; doi:10.3389/fphar.2019.01040)
Supplement: Supplementary file 1 [file DataSheet_1.xls]

## Sheet: accessions
SUB5772273 e68cddd999a4623ee63c37c8375bb89b	MN059945
SUB5772273 81e85af07b164bcfe0c1762708557f92	MN059946
SUB5772273 a1f0e0b9ab6c7c21887116ed61200b15	MN059947
SUB5772273 a0e09b666fb3e89b7d9afe78b334e670	MN059948
SUB5772273 1f9074ab2eaba16453da7e60c68a91ec	MN059949
SUB5772273 2e8c118cebb3739dbfbdf419cc0b8b3d	MN059950
SUB5772273 f254924e2869e18f65e907f9c692317f	MN059951
SUB5772273 8c84e3f7e12432000480edece2fce34f	MN059952
SUB5772273 6605038270f50e8f0c4ee084434b9617	MN059953
SUB5772273 243fbf4521ff5d0fbea7aa665db2d721	MN059954
SUB5772273 37ba0fff67f1b1d85223f9c158e72a6d	MN059955
SUB5772273 77a612105bacc7ecd7b5442d25a55960	MN059956
SUB5772273 ac507c03a656fc2ac73dc12d9998ebfa	MN059957
SUB5772273 b7b8db68fdb0381f7a8ef76823f27090	MN059958
SUB5772273 309dcf48ff88af24acdca02bbca824d0	MN059959
SUB5772273 4e12f66546ac41a672ee379b6881bb3e	MN059960
SUB5772273 0aaf862c238cafca46bf4f9ef209cef9	MN059961
SUB5772273 8ee6a4da32cb1d1a56169243bb228795	MN059962
SUB5772273 d7ddfe83cbdac7b11878f3d454dee813	MN059963
SUB5772273 19295ff8201a8c4a217763353eb30b4d	MN059964
SUB5772273 fa93bf083d7e7c0d56355ca83eafeeb3	MN059965
SUB5772273 0bdad8e5d99e32b8bc1bd0355ccac2a4	MN059966
SUB5772273 39d6200d86dcd215f4fa3168f2cc4a4f	MN059967
SUB5772273 0a781686d6fc2ff04c19da2e255f13b2	MN059968
SUB5772273 cf94d114c042eab64c1373e7f0e4dc93	MN059969
SUB5772273 7824264f8b1373a2ec2b3cecf5c017fa	MN059970
SUB5772273 46a3a9877a5186631f108deb13ff5f58	MN059971
SUB5772273 a4ee7b5a12385f41ddcf9842936a5272	MN059972
SUB5772273 b196244abd3db11027c557c11079d3cc	MN059973
SUB5772273 86b77f5d37f2f582b7823632e07ddc8d	MN059974
SUB5772273 80e03e5dbae070e3b29cc0c85ba50981	MN059975
SUB5772273 aafaf060cefacb719beb7f318c081d54	MN059976
SUB5772273 7fc6ef30efb9c984086343b94db1ffaf	MN059977
SUB5772273 93261cf6e7fc3dcb155caf555864dd5f	MN059978
SUB5772273 bf023140f5ce3e8005e196bacc9c78b4	MN059979
SUB5772273 92544bbf09a359eda986057d5f0fdb1d	MN059980
SUB5772273 87e6a4ce5ee52e6ca074e2f1e0aa03d7	MN059981
SUB5772273 91d315b09459e4819e72a15af17824f6	MN059982
SUB5772273 3760b3fdbcdad16f3fd8d0b226af57c4	MN059983
SUB5772273 6df903af430173db5b4150cd23c3e814	MN059984
SUB5772273 1cc67352e63e2da7c3ff3561d6acf922	MN059985
SUB5772273 ceae1321f3aeae35252daf0a8647fb39	MN059986
SUB5772273 320250f2de695d6491cc95725e9c0850	MN059987
SUB5772273 6b500d9d6718639fa8e7a267e3148f24	MN059988
SUB5772273 ab30e162272ef9b0c07902c607d3ccec	MN059989
SUB5772273 92be32b93cd5e9333e7526eb4aef6a28	MN059990
SUB5772273 98d5a60b9351948cd9b9ccdfb788c5c3	MN059991
SUB5772273 e754490892a271587f095f2f3fa91f06	MN059992
SUB5772273 e54e4156e76ab947ad1954b98497a7f1	MN059993
SUB5772273 884b459dd927602d77ef595caca93470	MN059994
SUB5772273 7cef5670801db0baa3c74c599d223cd5	MN059995
SUB5772273 d98d193df2cc9a80fe30cafce5a5401c	MN059996
SUB5772273 d29a43ac76b7f624a73f682f658c110d	MN059997
SUB5772273 6b58edda6826e5c1109b0e27041c3aaa	MN059998
SUB5772273 d6cf3c59e9fdd40378563989dd34b3cb	MN059999
SUB5772273 d75e685a082960ad717a3ca2542b30c0	MN060000
SUB5772273 3c0fecf7650e912f18e59e731a09e524	MN060001
SUB5772273 46227981d0d96c8ab6a119f97597a5aa	MN060002
SUB5772273 47886cdab0c9ef42a8993b84f2adf0e0	MN060003
SUB5772273 a53b13f3a01bdfa790ffacd02b2c538f	MN060004
SUB5772273 856149de520531cb111418257b8dbeab	MN060005
SUB5772273 2f51a7cd2c689080ed81669102a16ad9	MN060006
SUB5772273 762d4059db6d7ae2b2801386edc7c162	MN060007
SUB5772273 8e9e7a624e1066baf98f42cb8f99939f	MN060008
SUB5772273 bcf5addcb0648c2d9bc64c14e6cfeb7c	MN060009
SUB5772273 55c090736215213b35f1483a499b11f4	MN060010
SUB5772273 69db2fadbd9cd7895ba9f2df0b91d9f1	MN060011
SUB5772273 fb7694e8f0c2cdc5473fb7f05c9f8412	MN060012
SUB5772273 88f053b66e531242d0127cd80c91e19f	MN060013
SUB5772273 228802b477e267c97f340a0a505e7876	MN060014
SUB5772273 14a886169e830f2c05302d967386ed62	MN060015
SUB5772273 1e2db56e9d6ee31577eba2f166449c9b	MN060016
SUB5772273 a40858f86070acd7370de676a90e9902	MN060017
SUB5772273 66c6173dda03f31d75d4f18cb919124f	MN060018
SUB5772273 9352ac15790bb48fdc21f96df18ecbf0	MN060019
SUB5772273 d2fab9b1b057ee1317d518e76984d26b	MN060020
SUB5772273 de6fac4f1ec33a25311f8ee89ce0576f	MN060021
SUB5772273 0087a6707ae6d673174773a0e7e12f5c	MN060022
SUB5772273 6dbf2df34a59a6e80bcbc459088922fb	MN060023
SUB5772273 8f47244c4224508c71f20871854ac999	MN060024
SUB5772273 ed4590d02c2ff32f2434bf6d161aeb62	MN060025
SUB5772273 c843ad4a112b08481213e4b48d15eccd	MN060026
SUB5772273 45dc439a5b41a0d49a2d7c2f883f8193	MN060027
SUB5772273 4268b9fb06fe1c0031658730474f471b	MN060028
SUB5772273 d43091d4243a813ccc0d3a52c996fe2c	MN060029
SUB5772273 49ab18aa17cfbd3d5c4dc6838b692d30	MN060030
SUB5772273 9e53d0a661068ca47208bff134b6bab9	MN060031
SUB5772273 dee0e021c3b53b0ae8ccb53a7e1a01bc	MN060032
SUB5772273 963be163a1033584b2ae2363ae1da6eb	MN060033
SUB5772273 ae715d3b25dad982602d63489f739378	MN060034
SUB5772273 a3c22c167223046b25aaa995d86e10e0	MN060035
SUB5772273 6c8b959c05480b1e8f0c6c509efd19cb	MN060036
SUB5772273 2f2949ed2b4c02729c975cc77e185dcc	MN060037
SUB5772273 52300cdb6f35feb5ad5b984cb499b555	MN060038
SUB5772273 2f913d752cfbbfd88390ced7e1411a51	MN060039
SUB5772273 20c0bc95eced04caad42ab7144e6c62d	MN060040
SUB5772273 498403cc092cc71d1c0eca78a7fed9b8	MN060041
SUB5772273 dc19147005831834f1a9cb8d925d303d	MN060042
SUB5772273 51f8332853f34c27f591d15a0929a84f	MN060043
SUB5772273 4d39000df7e60d8d1ddefb5c0ceaa2b4	MN060044
SUB5772273 4d98957de7d025e05f03d2d611743798	MN060045
SUB5772273 f63c734c72942a18249041c546c663b0	MN060046
SUB5772273 e5e6c912b87c314a5e70af270261dd19	MN060047
SUB5772273 88291e0a8594481181612f52d4315535	MN060048
SUB5772273 723fc8131e4be408fb9dabbbdaa65d71	MN060049
SUB5772273 e7f9a92ce4f6d3c027fb07b400867a36	MN060050
SUB5772273 d8a3938c8b1cc550493770ae843c7c2c	MN060051
SUB5772273 77a63ac22982427a1d1bd4d5fd394ea9	MN060052
SUB5772273 dedbb01a423958c16cd9e4c4b3d1681c	MN060053
SUB5772273 9cefa345fb66ea54f3644f93d3d338ec	MN060054
SUB5772273 01aa6c5971cd0fbacd4cda5db7f0e7d4	MN060055
SUB5772273 55a46f68db778ad4e86e390499863ab2	MN060056
SUB5772273 37a60c5b1efd3a2d161d4c3562cc1ced	MN060057
SUB5772273 bfc4d6eb7a5f7302e96258ebfcf9a384	MN060058
SUB5772273 f11b565a13661747063f460c1ba52f6f	MN060059
SUB5772273 23717c3bee37a70c07b5c3d19b8c79e0	MN060060
SUB5772273 a13bfaaab522bcce4a9a79cb9d9234e3	MN060061
SUB5772273 d6207971158fefe877a066cdd4d4024e	MN060062
SUB5772273 ee43a5cfa38b37b869e274848ce4074b	MN060063
SUB5772273 60bce29d40f96ff6cb077bd0d0b47b2c	MN060064
SUB5772273 b168708e744c3edbe98bee5d9e1722a1	MN060065
SUB5772273 dfa387b0c8909635bc88a2e0fe77969d	MN060066
SUB5772273 c83c43c720bcea4b3b657166f11e519c	MN060067
SUB5772273 4f8e5a6fc0dab9e812ffcce05408af81	MN060068
SUB5772273 832fb2cbae6ab6670bf4deaf29499f02	MN060069
SUB5772273 fcba360046ab66043913e68e3065a6a3	MN060070
SUB5772273 524b1ba973e73b80bcd45ec315eaea01	MN060071
SUB5772273 e5de500258dd171801e47e6bba0dce70	MN060072
SUB5772273 cb04bc56ea1f662ca4ca597d2217ed67	MN060073
SUB5772273 1c73e0b473d7645fbc4f891d8bc7da0f	MN060074
SUB5772273 80b546229c316d1e38d693355f79cd09	MN060075
SUB5772273 d401961badfe31e45f1e142b235b6932	MN060076
SUB5772273 a6001a7b5631d349df1b60db37707c95	MN060077
SUB5772273 7f9626159d21101873f3f578db124e0b	MN060078
SUB5772273 d4c900022e1338be6d02bf12da87f7c3	MN060079
SUB5772273 aebad4d2e18b75fe171e174079b0d6df	MN060080
SUB5772273 d6530c3798131811d2102c1b10d227db	MN060081
SUB5772273 2918a385f32f5d2a1aaf34b1f6ec9d53	MN060082
SUB5772273 b28c60066b37bbcc6f6a7dcb1be47af3	MN060083
SUB5772273 6fac11af83d3a5691274266fe9fa0ec2	MN060084
SUB5772273 148d5abe9b0e27088f8c732eec7249cb	MN060085
SUB5772273 75cd170203e149169b2b6b5540c2125f	MN060086
SUB5772273 8124b29d1567894024dc19802f4a694a	MN060087
SUB5772273 cfb94a1285047076866545f7b958b792	MN060088
SUB5772273 3ab1f392d64a648dabff6dc0db01fb7a	MN060089
SUB5772273 395ec59b5299e3847fa7680c8240b01e	MN060090
SUB5772273 75425eef61b1f02711daaa07400ada5d	MN060091
SUB5772273 665063829085b40376fab81510aa5e7d	MN060092
SUB5772273 1b4a02ec2b10f51532d6ee3ff6626af6	MN060093
SUB5772273 1652021d1d3e86915d5a4deedfdfbdb2	MN060094
SUB5772273 31e18578cae62a5de3fb46ef4436c66f	MN060095
SUB5772273 c7b1f4f96013789c1b8cdea2b3fbcd05	MN060096
SUB5772273 437fcf6853427691c7639c4e02d8ee46	MN060097
SUB5772273 db3e9fd42550abafed654da47d58e8ff	MN060098
SUB5772273 4bc217b78165fa6a9a033bb64c5f1de6	MN060099
SUB5772273 63539c38799ece90855e36b960cab19b	MN060100
SUB5772273 e397973cac95c5c053b335926e448863	MN060101
SUB5772273 ce28b9b9300a9e3015e343a859197eeb	MN060102
SUB5772273 cf9f1a4792d2fe296300b5e84b6e3f4b	MN060103
SUB5772273 2d9ee7d86b02439acb16c0cf1d7c7f40	MN060104
SUB5772273 15d038cfb4ff94779b685478b758f707	MN060105
SUB5772273 766b6e9710256db0e44dab744aa888cc	MN060106
SUB5772273 8d98cb90622007c09de8e8ea3acb174d	MN060107
SUB5772273 667013aa246cee1b7b8763aaea116863	MN060108
SUB5772273 557a5a31c12aeb6c0a065352e93870d5	MN060109
SUB5772273 d8998b969c404663c1623553aac1879d	MN060110
SUB5772273 0c79f5bb95bc41fe3a877967617019aa	MN060111
SUB5772273 7a73ec1bd6e86123561eb92fae9c4b33	MN060112
SUB5772273 9f66c91d54c392968750b19b060c4ce5	MN060113
SUB5772273 4334604f29a519ba4061b101ce6c9438	MN060114
SUB5772273 05f63083b88e1b5f5818a5a943ce38db	MN060115
SUB5772273 3dbc537942a21c6e618bae375160202d	MN060116
SUB5772273 350533a50176bd8fa91b940b1b98e6de	MN060117
SUB5772273 691aef21f5a3159b77503474415d3ddf	MN060118
SUB5772273 ce01c19ceaa8e49a59e49c52e808ab40	MN060119
SUB5772273 0bd646c4eaad46c8fe04bdd23c5f4d25	MN060120
SUB5772273 2cdae3fc984b418cd735989a9b916689	MN060121
SUB5772273 0fe1691d672f500c710b115bb92e9001	MN060122
SUB5772273 bfd9e4d09188a4251d4468fd758c1874	MN060123
SUB5772273 57cb7be6c150a0cd5616d15e71a7bb37	MN060124
SUB5772273 a84b9a3382696e1ac0c08308c70c7f0f	MN060125
SUB5772273 9a2422cb6b68e57fd1181f8deab4d7c8	MN060126
SUB5772273 526bdde20b3a72f3954c9b66341347cc	MN060127
SUB5772273 729a59a855a91012d1060f4e69332885	MN060128
SUB5772273 83cf9b499171929576dc2e0cfffd51cf	MN060129
SUB5772273 33efbc2246ec4f0d696d6164c8fc2f25	MN060130
SUB5772273 9572ec262c3af41b61c744ce4c5de2f9	MN060131
SUB5772273 178807dda2b90cbe3f69de19fd06b867	MN060132
SUB5772273 2e8b1e5922c4cca1f1bc9c010ab10e47	MN060133
SUB5772273 658f20a189e43b8f6e1e325c42cebc45	MN060134
SUB5772273 1d1dc477966a793679dbc02e7461a81f	MN060135
SUB5772273 e872fc77f01e5527bbeec1d0438dd84c	MN060136
SUB5772273 13f1df8a500a45aecd51aa0e457aba82	MN060137
SUB5772273 b4d6928ac1bab4179deaf2b419112fba	MN060138
SUB5772273 e73f821f94a3d3d2816f5e2b5bddd165	MN060139
SUB5772273 dadf5e046c306eada108c4624ae2346a	MN060140
SUB5772273 91244e2181af2b660613d35cf1eafcc7	MN060141
SUB5772273 248d62e17acd4852d8cc3ef771026333	MN060142
SUB5772273 992f7d5fd90a26c8623829b6229b6401	MN060143
SUB5772273 f2b7568aee77c1e67dae0f61882c3ede	MN060144
SUB5772273 7fc1e5c4dee5b05f18f5ab04544e8baa	MN060145
SUB5772273 f7c1658389448bf444cf36965ef6b951	MN060146
SUB5772273 5a36eb6c31b45f2a6d37fe0c9794214f	MN060147
SUB5772273 a3bdd7573367cdb31226616b7d7df6c7	MN060148
SUB5772273 8befd21de5ec5f239ef36a873b8f680e	MN060149
SUB5772273 16f89b98fb2819358c6409aee9f2568d	MN060150
SUB5772273 2ef5f9451ef3c5821eabf1d335eff5ac	MN060151
SUB5772273 fa7d660e1417ee773d385ace0fd28017	MN060152
SUB5772273 75e0198353fb0a2088fbf2ac5fd495ed	MN060153
SUB5772273 eb34021bb371723457648a77cbbdb181	MN060154
SUB5772273 6156f5af145a0a4e005369747a1b0195	MN060155
SUB5772273 1bfa1fcc7d9776e36a72e046699a1991	MN060156
SUB5772273 781920cebc8704fb8efe7b43587e811a	MN060157
SUB5772273 825c4abf84cdabf8b053c21d8898f07f	MN060158
SUB5772273 be3caf59558dc0cfd754eb89360d7df8	MN060159
SUB5772273 cb6d30ab2af751afd1cda8b5546d0c7e	MN060160
SUB5772273 bf1c8a3686a97fc6d65f82e0cf60c589	MN060161
SUB5772273 904492361faa7dc46d699a5ffbcec0ef	MN060162
SUB5772273 2ecfb2089edd72d735677dac3fa7224e	MN060163
SUB5772273 58fc2ba86926b71c73a6a286150714c4	MN060164
SUB5772273 000666693c162d5818ed1deeb11bf1a4	MN060165
SUB5772273 c35ac32b67f867868b42f581d6ad599d	MN060166
SUB5772273 1489d1032fee4b34c3accdec854d2a40	MN060167
SUB5772273 429d529fa953e2563421a0927d840898	MN060168
SUB5772273 8103f1cef8858c6b1fb839b96b2e793e	MN060169
SUB5772273 2ecd4f9225a0356744b1bac528ca9fed	MN060170
SUB5772273 d2a2e9a5c757327e07c5aa1905549133	MN060171
SUB5772273 b28e6631cfd68ec89abe6bf32f4a7133	MN060172
SUB5772273 c9ab52e70a175779b6d502dff8b0f4f8	MN060173
SUB5772273 8a2369334ae74440c4e1741943929dfc	MN060174
SUB5772273 4fab186bf349bbb71fddeb76042c90ff	MN060175
SUB5772273 925f0878f2237b5e2f672a33b810fb38	MN060176
SUB5772273 ab258c19d90c9bb2e99862227210a5bc	MN060177
SUB5772273 f453ed7041d38a31713c582967392768	MN060178
SUB5772273 e7a334cbbce580f48a2dd9085ce93a7d	MN060179
SUB5772273 304a41b46635c4fcd17d9d6a69b5526c	MN060180
SUB5772273 2d79f09d2ade71e429d1bbf33ff6ed77	MN060181
SUB5772273 60c17953e11babc312d00a49c53c0518	MN060182
SUB5772273 1320d54fda26fe4501a9b0f8c8d5cfd2	MN060183
SUB5772273 0dca3d49b88a87d9fa05f4bf3f2c9f1a	MN060184
SUB5772273 7ba59978651750c64ffaefd3fc5cd309	MN060185
SUB5772273 b52b3e3bd31cd04612867f9571c54182	MN060186
SUB5772273 ca8e3a9ddababdba3528bcf74295aac1	MN060187
SUB5772273 798f7bf5234c1c9cbf7494273eb7affc	MN060188
SUB5772273 0336ab2bb4be9579fcbb90031a44c55a	MN060189
SUB5772273 a6685ae17161c7f948af5d975ddbd8c4	MN060190
SUB5772273 92de088132f301cf6639056b6b82cec7	MN060191
SUB5772273 94254a390be3dc330f0eb6362207dfe5	MN060192
SUB5772273 788159399a7237909835e9088696e3e4	MN060193
SUB5772273 19d2adc909e3c5db701a9b96fc24caf2	MN060194
SUB5772273 532e33a7dff6e04c86fb3e66dc468142	MN060195
SUB5772273 f3359c92de8d84a5354bdd55643772a8	MN060196
SUB5772273 dd9162bf4e8234b07187f6e69697ea89	MN060197
SUB5772273 073d06804777b9abbe48b3c0d1cbf4e3	MN060198
SUB5772273 db9fbd3bee06fb2533cbfb6a30284a3b	MN060199
SUB5772273 ef9e588bc1486797f77049760927a06b	MN060200
SUB5772273 809ada4d89c7c59f4c82e627736abedf	MN060201
SUB5772273 b7081c724e2b390a0c3e6fe802d359d3	MN060202
SUB5772273 f2c89f13c0e2f6bae35739180e004c25	MN060203
SUB5772273 29306919acd1959798145911f002c150	MN060204
SUB5772273 4fc4e9010feafdc0cda743091d24421b	MN060205
SUB5772273 2231a7b12f0163074e7d92dc64b468dd	MN060206
SUB5772273 208bcee5b11f60c4deb540f3b1889349	MN060207
SUB5772273 38c1eeb90dc208cff285560540bd531f	MN060208
SUB5772273 42e280a13b67c30760802c38e698b866	MN060209
SUB5772273 e42a012a743efb9619698d1958ac4df7	MN060210
SUB5772273 24d249e705e6999f6fdb0d980d094c84	MN060211
SUB5772273 3bb0137fa90a113855125673d61b80aa	MN060212
SUB5772273 a5075e43f769bb29ce7060ed7821ef17	MN060213
SUB5772273 de51b4108017695a0bfb5a9f4c81a250	MN060214
SUB5772273 679c65bad0344393421b23ab403c06b2	MN060215
SUB5772273 a8a72e32bc9339a0bb659b7b049224ca	MN060216
SUB5772273 781547800c5706ccedaa78015fc5e8ae	MN060217
SUB5772273 69e9deb1b4cd70cf772a9345672dd931	MN060218
SUB5772273 0d6e368c8ae5ee5c9d66d0288c738325	MN060219
SUB5772273 f97baf5c4d27213ad02df241ca78b5aa	MN060220
SUB5772273 a86adf31ed05b5db40c8897225ac1d62	MN060221
SUB5772273 65f8782185c21324d467b6f4cb702ae3	MN060222
SUB5772273 1e448bac8423c14b9deee87678fb6d0e	MN060223
SUB5772273 a72209b894124bb0cbcfae11e4bac25b	MN060224
SUB5772273 ef704767722888efc261b0f2063a0c85	MN060225
SUB5772273 e493e329f067cda9d681a32ca9c56c4f	MN060226
SUB5772273 3b5fbca57cf24a839c323392bb92d164	MN060227
SUB5772273 bffc1c729199f44c0d5420f375aec45b	MN060228
SUB5772273 2dc44cdd3afb2c645ed9d27c717f63cf	MN060229
SUB5772273 7033590e10410ec18004d6496d1d1211	MN060230
SUB5772273 9b203c3d828cc5ea030d11335eaa5705	MN060231
SUB5772273 4b111aeff3d3f35cbbbc54c354f0de5b	MN060232
SUB5772273 6e4e7a99ced0df219b67ef1992bebdbe	MN060233
SUB5772273 59a02ed2921d76eb8d781f378754bb64	MN060234
SUB5772273 f642f520ee52826de7fb49befcb8768f	MN060235
SUB5772273 10671b982165fdbe738b9b687d44a389	MN060236
SUB5772273 184e0702bab0aaf8900affe720745252	MN060237
SUB5772273 0e6249dc57cff4d61c4b284de1320ecd	MN060238
SUB5772273 ff8e29eb492b124f2471d5dd4b3107ff	MN060239
SUB5772273 b0e2c9e481091d86cb9cdb025f154fb8	MN060240
SUB5772273 e98861c16e7728c4be17c956faed0696	MN060241
SUB5772273 06f55fd09d237f9ac2d7678182b25d79	MN060242
SUB5772273 4a42d5454f388fbcda906ceb1ee56569	MN060243
SUB5772273 9e2beb61c3f0ed852c6e0ddebb0410fe	MN060244
SUB5772273 ec3295d250788c5fe20b14e90b053d23	MN060245
SUB5772273 b12705ca89a35c5df7156dbc4036b1ad	MN060246
SUB5772273 61436d5626cce76e5628927f1ce6a6d1	MN060247
SUB5772273 09363ddf2e57614ab602e6326be05e85	MN060248
SUB5772273 348dbf605fec4fc502b737f2b8a46e9e	MN060249
SUB5772273 ed9569e3e0f617f1b3808323ca3d61a1	MN060250
SUB5772273 173507fd30f30ab209a3721592b90def	MN060251
SUB5772273 93664f408f0d345384afd48b27109e9c	MN060252
SUB5772273 83a4643ea50d2e882714c780394489e3	MN060253
SUB5772273 bcd31befe75dd5641b3343a2ff556430	MN060254
SUB5772273 180289482f61269064e0ec072bdba892	MN060255
SUB5772273 07231f23d37d3a03bc3ebb1259a16bff	MN060256
SUB5772273 2ba381b27c90c9b11c4d51e53bc0905b	MN060257
SUB5772273 6fdc40c9e34cb405f9d1af26a23cc853	MN060258
SUB5772273 818f8c3c2cb47d8e07c2b17add9f1dca	MN060259
SUB5772273 b9194586dd875d1f7d96ddd0185584b0	MN060260
SUB5772273 1189b483a12f9a0de4423a7baec1896c	MN060261
SUB5772273 11bd83eb1b068df5fc770c54d8e8c3af	MN060262
SUB5772273 89da5b8aa6367bced0be369b482272ce	MN060263
SUB5772273 cc87420767a6a0f19b52872e12812958	MN060264
SUB5772273 3709524c45f976f63273ad9d3c6f4c28	MN060265
SUB5772273 4bd21e7ce209799d5342030a4883e315	MN060266
SUB5772273 36a2043ea73e214d7db223e686501c6c	MN060267
SUB5772273 b848d9787a85f5176161cf17e8c79781	MN060268
SUB5772273 3187e8209ede22b3073953b5253d1b38	MN060269
SUB5772273 382927f9d093c35092abf55ca5c512b6	MN060270
SUB5772273 f5878db68c49711cfd0d8c18df33ffd3	MN060271
SUB5772273 646bb5d19be08f648ff5cd221a8f5de0	MN060272
SUB5772273 d57319b1671d5be3270e869a2cac07d6	MN060273
SUB5772273 5586c0c4d8bb4b09892f87e9c2b9effa	MN060274
SUB5772273 bf4c6b3ccbc60793ba1327f5f43e530e	MN060275
SUB5772273 04be1c1e6ca9aa3c69e5486d709746c5	MN060276
SUB5772273 2dcc9639a94944ce7298f1b7b87a0387	MN060277
SUB5772273 d32100bc434f4da5b83e19a72fa84c1f	MN060278
SUB5772273 475cf516726197ade47bb77a92f75b25	MN060279
SUB5772273 4ef8c1cca8f7ed444a738d69832ee8a4	MN060280
SUB5772273 90b78027b5d0d13c754f14ce79e77c91	MN060281
SUB5772273 3f31e785b8ec0d4ca28a929b0ccfd13f	MN060282
SUB5772273 059f29ead11ec399fe339ac01a665b0e	MN060283
SUB5772273 fcd953eb38b5b21466d495eeca792641	MN060284
SUB5772273 08aad49a2d09e119891f480925780fcb	MN060285
SUB5772273 95516ad7cac4e3b3dd1dd24968655ae2	MN060286
SUB5772273 ffafd1522ddeb45e1a60aaa0e446f331	MN060287
SUB5772273 e13fca1a3615c3c1c3b2ee97919b3b1e	MN060288
SUB5772273 d10428c6823fad48c7e1ddd55d42a907	MN060289
SUB5772273 3bb484179082c50f38eba4ed4d47b086	MN060290
SUB5772273 c45205aa55700aaa34786e9393cfcb2b	MN060291
SUB5772273 92f37034cc9e638b993566dd4cf110d5	MN060292
SUB5772273 c4f09b18f18ce3dc0c3dab6d19fffa34	MN060293
SUB5772273 dce3140ee2dfe98fc9905f6c72bcb7a6	MN060294
SUB5772273 e6d72641c7b8c766646b9ef400e2fb9a	MN060295
SUB5772273 96976a84e27e317c3f3311bf7fec398f	MN060296
SUB5772273 bbc9718d081b25d3ccbf6822aa55c0d8	MN060297
SUB5772273 2efd9552b6f6f9d0110fec8f3adfe917	MN060298
SUB5772273 e98368cff788b0946ad0be3a05a41630	MN060299
SUB5772273 f669bf69ccebbc3d908c6c4aca5471a4	MN060300
SUB5772273 fe3b5182c3afd5aa1f62c5bc1724ada3	MN060301
SUB5772273 1ced9ff031df722416a4eade995926cc	MN060302
SUB5772273 b3c5164a26c6e63815e92ab1204b0dc2	MN060303
SUB5772273 b475a8392024e74a094b2d7f364e4047	MN060304
SUB5772273 b1792eeecf5b387210001c7bd463fe8e	MN060305
SUB5772273 0caf5372b3dbe79c1912e83e5c2702f7	MN060306
SUB5772273 ba7d36790854fb8ca79bc769cf5832f3	MN060307
SUB5772273 cd125331f8c61fe08c1bbca966263c7d	MN060308
SUB5772273 629e570fee5265b2216f600e2087be69	MN060309
SUB5772273 86f73412034f5e64304ebfd708a77d79	MN060310
SUB5772273 fe140a67855b6b7cad005b9e6bc1a00c	MN060311
SUB5772273 c1091ee4f6e637271bd61e59ae3fc4f8	MN060312
SUB5772273 67bd58987d2dc26994160936e5784251	MN060313
SUB5772273 c352fea2982e1d6d918de5084407cd18	MN060314
SUB5772273 0e06376e381e933c4e33783579839a32	MN060315
SUB5772273 6686d6ee343bbc9e806d2c3894582a30	MN060316
SUB5772273 e5c5ee904eac2e4af73038476d56f59d	MN060317
SUB5772273 6a0e511f27473216d2d6090cb84e2ca6	MN060318
SUB5772273 43c373937658281e0ccf75c40348ed1b	MN060319
SUB5772273 2a638846699fec261a238d678fd3cf0f	MN060320
SUB5772273 09f3316c649e49071ccc835311eb2bd3	MN060321
SUB5772273 d3e0d053f2d8bc34b3fe809b50c1e1c9	MN060322
SUB5772273 6370764052105c33daca325c210ad0b7	MN060323
SUB5772273 ba5aaa19f633d7011a4f3fd76eb3118a	MN060324
SUB5772273 dbd87e6953d3a2d90d2abbdd982d3bcb	MN060325
SUB5772273 97d569579e9622204be3c58671242605	MN060326
SUB5772273 ef78bbd0364ab4a82171284d485f1ff2	MN060327
SUB5772273 a2c544493e2df80ec35228a69f8184e2	MN060328
SUB5772273 4d0ac6fdeb4c01e1b0424be06adaf773	MN060329
SUB5772273 9dd91ec88720b8c461370dd0326c7dde	MN060330
SUB5772273 8c5824bc3b0920f665ddf809e98cf796	MN060331
SUB5772273 5636f4fa1e5dcd386865f80697069669	MN060332
SUB5772273 7411f0806e013ccfe8df1a1641210680	MN060333
SUB5772273 0fb764522152f685f48177e6261a8aad	MN060334
SUB5772273 f46c6d0f095742218c71b92e1af7dc0a	MN060335
SUB5772273 556945e0730938944e5977bcb547c61b	MN060336
SUB5772273 179f9bcef22a533368568bace053711e	MN060337
SUB5772273 adb6616f452fd68def1a20890cd9aaa1	MN060338
SUB5772273 eee2f65603642fe58f722b679111031a	MN060339
SUB5772273 abd433cfa0e0c831c64b89b8d63198ff	MN060340
SUB5772273 7c9f0cdf7ded7baa7236a6f71abe5695	MN060341
SUB5772273 ff26db03627efdb78987985a93132c05	MN060342
SUB5772273 9b40bb363a16e30419eae0f678dbe024	MN060343
SUB5772273 f5a6554e1ee29ad3c9f4e01c25f74e74	MN060344
SUB5772273 d1dd38fd9bc954c6b6043e3ed2f11259	MN060345
SUB5772273 74aa98d4013a1c5e0d2106f45fe11a90	MN060346
SUB5772273 780e6519e74f4f496666024178d6af48	MN060347
SUB5772273 066f7a34b7071b1897f6ed53bb51e664	MN060348
SUB5772273 4e6e26809006d0d55584539a68edd786	MN060349
SUB5772273 efccabb3c6945a6e6b4fd5d9ca92b0bf	MN060350
SUB5772273 f47ab266ed6e1b014853d211e12e62de	MN060351
SUB5772273 f9ccb1f4f4d501be5dbea1fe2591a312	MN060352
SUB5772273 0f4d579c7245246fcf206dbb594e813b	MN060353
SUB5772273 63717420b50d58b595cb7c0c40b6587c	MN060354
SUB5772273 b5d823815d448d0392a8dbfdedd3d394	MN060355
SUB5772273 7a6057854b4e481efec3a180be1d0210	MN060356
SUB5772273 17346ca9e1ca9589631174535114d6c2	MN060357
SUB5772273 7ec0af63c683123f3b313e26e026cf5f	MN060358
SUB5772273 72a077d805ee36fb67a2f8be78154997	MN060359
SUB5772273 fc2270db5e53e442db71c337ddb4947f	MN060360
SUB5772273 18a8931594bc5f289cf3bb8f25693882	MN060361
SUB5772273 fd80a14093c4df84ca39865e3e41e014	MN060362
SUB5772273 3475b787099c6e5ac83380322c3770bc	MN060363
SUB5772273 c2979b1b97c74ae9f6c1fbe1d7e62e28	MN060364
SUB5772273 6a59ac65a9676ec74c7cb292fd88b767	MN060365
SUB5772273 4c84eb4b0f5ede03f69093d2b2389fc9	MN060366
SUB5772273 aa1102245863eb79dd57dec002ce3508	MN060367
SUB5772273 badceb3e2b099d95e9b1ed9958b539c0	MN060368
SUB5772273 38a5afa9cffc73a4e1d42892e88415b9	MN060369
SUB5772273 2ec40c6219d3256a39089c67ddda4183	MN060370
SUB5772273 211860c1ef210a35a53db3019d21b1d1	MN060371
SUB5772273 da4cb8413d4ba792376f89539791e1c8	MN060372
SUB5772273 f03393c6e519219cf8610909af3095e1	MN060373
SUB5772273 9b5b6f90efc87b503ef69b50cae6b6cf	MN060374
SUB5772273 fa11758e8607e8f5ee209182cc5b39fb	MN060375
SUB5772273 45c375acd2a1b605712f62d07948afda	MN060376
SUB5772273 5b4673b8329deb8993fa1134197daf2e	MN060377
SUB5772273 c107e0cad98281ea50bea66a4876046e	MN060378
SUB5772273 97019e434303542c064e058ab2a21810	MN060379
SUB5772273 ff687af5c7458ca1ff22b8b1fa24484d	MN060380
SUB5772273 4d6e7000cee4a5b40f24c4f8524ec9d1	MN060381
SUB5772273 0e2898c942f464dbec04f62c13ef332b	MN060382
SUB5772273 49a7d8e1c01c8ff8834947a4e2f3f691	MN060383
SUB5772273 60f18c4335e96525aacfcb562eac4311	MN060384
SUB5772273 1d69b22ad424c9f72e48e51eedc8f4b7	MN060385
SUB5772273 19101174741741f0ca390facdccb06bc	MN060386
SUB5772273 70ad8bb2fdc82f43b9b2ab9b3975f302	MN060387
SUB5772273 7e5e13a9dd9ece07068a85b2a72a07a9	MN060388
SUB5772273 49d43a7028f057326fe70014fdf7e58c	MN060389
SUB5772273 f8f888ae9ec12b00a8eef51830f1ec77	MN060390
SUB5772273 a6be65fb22c0aa332bc8a52e4cf9c477	MN060391
SUB5772273 8128a06c8f9947fccfb1427355ecf81c	MN060392
SUB5772273 41dd3f31be8a52dd26d78d359fba5ecf	MN060393
SUB5772273 aea27a4cf4ecfd15dc5cc075d6be6754	MN060394
SUB5772273 aa87a82eea4068b12c61284b629a48df	MN060395
SUB5772273 aca4442a843e401f5a19af9cfd711483	MN060396
SUB5772273 d6208b3315bb42cad3c0d3efbd306c06	MN060397
SUB5772273 255addd0e9abab6255beb1d9295c4b02	MN060398
SUB5772273 de1f26d39865d84252e008cf13338909	MN060399
SUB5772273 1bba08ae972c707173d5724d0ce43ca4	MN060400
SUB5772273 eb44e69443b70fc2bcfb60f19bb026fb	MN060401
SUB5772273 3aae26ebdcd9f66d891e378b6ef795e4	MN060402
SUB5772273 5707e2d7c184ef53418e705bc8b13450	MN060403
SUB5772273 b8a2f01d08e0059eb771fe958210fe83	MN060404
SUB5772273 526f3588f203801afdefa469a413a751	MN060405
SUB5772273 9e53b6c588c56927216a6f2dd025a761	MN060406
SUB5772273 1d8fa5d77ca3b690de24c4e3bb267dda	MN060407
SUB5772273 6e8bb7277e655a95c40626b2a5fc5df4	MN060408
SUB5772273 1e31ba2626bccc74c45bd5215339f1d6	MN060409
SUB5772273 5c2dd6f8a829bf03db8dfe1a31e836b4	MN060410
SUB5772273 bb1f03f096a97d6efae5ac708e9cb103	MN060411
SUB5772273 37b219ee3081dccec14e6434b4c9c2af	MN060412
SUB5772273 30d783bdba976c15d16e5ac698e7303f	MN060413
SUB5772273 795fd1cd4e5324d36cd936b4bcc70362	MN060414
SUB5772273 70f1e5319f96ea480ac53b784317c065	MN060415
SUB5772273 f29bbc8ead6bbe24ef308d2babb2e07c	MN060416
SUB5772273 0990bef157ea73c73acd4c3dacd13095	MN060417
SUB5772273 24320c26fa05011ab00c5e6c5852c798	MN060418
SUB5772273 fb1a9bf675e216db290f50616d91128b	MN060419
SUB5772273 674bac0bc7d51683d5e4da305719ed91	MN060420
SUB5772273 9132de7dee6423d8db3ecdef1908341e	MN060421
SUB5772273 9beebec20c36b56e56aa0f2f8c748477	MN060422
SUB5772273 dcf3b808e2685a7afe083de2deb7f659	MN060423
SUB5772273 3340b4c52e9cd759d3c46053dddf578d	MN060424
SUB5772273 40e1c62c04d1bcf0c4a90df5859d5660	MN060425
SUB5772273 3c7f8b477aa0d9881d7edaa30d835371	MN060426
SUB5772273 781b462d12cbb6c7a9afc2eb7a39eeea	MN060427
SUB5772273 c5c971972129b0b124f5b9c0b83ec407	MN060428
SUB5772273 519bb29e2259ead4d3d99f45c2e4d1be	MN060429
SUB5772273 cc34977a3b28701576206be174f80375	MN060430
SUB5772273 619e1c53fd67c9c3e99811bdc51cd31d	MN060431
SUB5772273 a2c7e54e8c0acd52c12d3582aad4f195	MN060432
SUB5772273 29d81fa5823d7087f67585faac53454c	MN060433
SUB5772273 e3d38aca27016f6a1dcc37c9aa0d3fb2	MN060434
SUB5772273 968f63825139d2562d1351caf96175be	MN060435
SUB5772273 9241d1c74f1e6f5aee6bcdc3bd95be24	MN060436
SUB5772273 9b3b12148a07a19b0c4ce6580b0b190e	MN060437
SUB5772273 9e36411160609a1ae26f9ac242937153	MN060438
SUB5772273 929d7efc2faf873aaabbccee35368ba1	MN060439
SUB5772273 758ad14a5bff80b71a0ee12de8f8bae5	MN060440
SUB5772273 69caf27e6db801993f3dffe7e9c35ace	MN060441
SUB5772273 db4c19b85ee7f3ced00fe2e200d7de38	MN060442
SUB5772273 2e8ce3759fbf50096a35e47c1ac8479b	MN060443
SUB5772273 a7e7eff992c8a2745a96ca7d22dbae30	MN060444
SUB5772273 efa6c2371c0e9ec12f335cb8db00c03f	MN060445
SUB5772273 2e6367fbe783ba4f31649d559ea90c66	MN060446
SUB5772273 15e7f5bbef53c80537d39de26f356691	MN060447
SUB5772273 49bdc499b7cce11eca3731ecb7ce250a	MN060448
SUB5772273 8229b528fd63bba303c2848bcce90949	MN060449
SUB5772273 25239067e63e889b07331506294ac5b4	MN060450
SUB5772273 d006d7e3f0542cc3c311442706c8099d	MN060451
SUB5772273 afa12dea4aaaa804ec2ad3312c624542	MN060452
SUB5772273 0b6c207a9fe920463222c4824eead66f	MN060453
SUB5772273 a28658c10b9d1538e500f6ac32e06c7a	MN060454
SUB5772273 abfe91a964ba0dd43935abdb959e9706	MN060455
SUB5772273 52ad613d8cfe882947e35a032b8b428e	MN060456
SUB5772273 923ff93b9bc073bffeb9c93a6bf8559c	MN060457
SUB5772273 85a0ed6e429383f33d4e5ace155efddb	MN060458
SUB5772273 6726ce80beef43677499d309c8dbb172	MN060459
SUB5772273 7337bebd46613da409949fb650fb006a	MN060460
SUB5772273 a06f2257e52ff024f778dd31084550b0	MN060461
SUB5772273 aba91703074c3d3be21104c455486c09	MN060462
SUB5772273 c846d54eab44293bc6416528c4df4581	MN060463
SUB5772273 7eb9703cc3f0b9e0b15d7fc312a92d70	MN060464
SUB5772273 afc1fc3e25f6586cad0545720d23c3d9	MN060465
SUB5772273 7b4aad8ca9bedd851dd0a2e7a9a8cedf	MN060466
SUB5772273 1345082ab6e2e78c2fdf5a3ea9da90d7	MN060467
SUB5772273 da0d7ccb9e8d2bfee0f36702efb2cb01	MN060468
SUB5772273 10781e249635acd3a87819de07ba28f5	MN060469
SUB5772273 de3bb6f0ef5f611b71d2754abed4157f	MN060470
SUB5772273 7b9e314ae4ebd33f87cdc8ca294ef46d	MN060471
SUB5772273 7a1cbc608863fab264af1963c4042228	MN060472
SUB5772273 4dc03bc11d4a5fded5bab6ccb2583c44	MN060473
SUB5772273 d0512ec10cf14fb56428296340c734ef	MN060474
SUB5772273 80239bb1fce991abf7e21ac2360feddc	MN060475
SUB5772273 9c149950d8175b6d18cbf57ef5925c10	MN060476
SUB5772273 d6c367ee15dde64ef969f10419837511	MN060477
SUB5772273 af0c3cbfaa29a587439cf4d7761f9c54	MN060478
SUB5772273 4c8d96343ac447a853752021ca3cf588	MN060479
SUB5772273 ac4be90df4073a5e8045d05c004418fc	MN060480
SUB5772273 8a8bf417a73fed34a74b893f1788d83a	MN060481
SUB5772273 47044452d9d13c46e854daac2799b425	MN060482
SUB5772273 9b0b5d51dfac8cea015a2064e695068b	MN060483
SUB5772273 0303b95a5dfa01fd42774c01ce465de2	MN060484
SUB5772273 602588758e2d6f78ad1e95cbb712c17d	MN060485
SUB5772273 60f985af5b0e568abbd99668eb8de23a	MN060486
SUB5772273 93d608ab3cc557bd6dc4e2eee0bbfd56	MN060487
SUB5772273 ebd54371db71ec9b4781508946edee03	MN060488
SUB5772273 7da587af0eecb7f92f9ca88282dcfd2b	MN060489
SUB5772273 933128081edd8c8a3c02805da911362b	MN060490
SUB5772273 e5b89b099967f6b390d725c5c6ec6b0e	MN060491
SUB5772273 ed3122931334133547ccb43a927ab556	MN060492
SUB5772273 047501ebcc4d6365ee3f46ada375bb0b	MN060493
SUB5772273 17c7c88ff65b6ff3955fc293a3b4021a	MN060494
SUB5772273 339aac988d1d4db066941680f4a371a7	MN060495
SUB5772273 a4c62ff4c4e7360d66b4dd2a1fedaf80	MN060496
SUB5772273 604e454cecd5e5fd751dab2c87a300bf	MN060497
SUB5772273 d0dfc9c07266aea493caeadb9cd5929f	MN060498
SUB5772273 e464ee924b83adfd5fe7bffd0759e308	MN060499
SUB5772273 9848d1f99c2eeced9384ef59cc726155	MN060500
SUB5772273 b717411bf9e7e27bbcb4b06c11b1a9cf	MN060501
SUB5772273 ef417a52c0d08b90ff31e9be6f8769cf	MN060502
SUB5772273 2f1e581b7b6086eb769c5e8d5e3dcb9c	MN060503
SUB5772273 a36a6768371795b8957cfd2ca7def184	MN060504
SUB5772273 0b0aeb3a71ec4fd56e5eb416df9569e9	MN060505
SUB5772273 85cfbe3bcb112ef374a3c338535e0e58	MN060506
SUB5772273 7d0d18cdf4dd9daa2115824e2a75c8b5	MN060507
SUB5772273 f120ee152ad3aa5f06f34c27017d704d	MN060508
SUB5772273 453b1fc12a40e030699839970ff9b04b	MN060509
SUB5772273 abe3576646f172aadf75cb4efca58b82	MN060510
SUB5772273 44647ba293d4eb44f01f25031fd623b3	MN060511
SUB5772273 568feb702f6bca4e92c0c2e8447daabc	MN060512
SUB5772273 9e5de51a138101b13ec20750d83ba723	MN060513
SUB5772273 a5557698a377469c38808d5ab3f60d62	MN060514
SUB5772273 417a76772f299ea790161c0e5d1dc8d1	MN060515
SUB5772273 c90494950b9762364e1cfd10c9dd7549	MN060516
SUB5772273 8a8c4f9bcda084b6e3b4d96b805a4e43	MN060517
SUB5772273 f59216952abb958c287b8dda57a87c80	MN060518
SUB5772273 84167f229861aefe623d52b8f40d6570	MN060519
SUB5772273 f86a9ed8a427fc4901410c0ecadacc44	MN060520
SUB5772273 7c80043f864bdc1c6b78eaa40e27d4ce	MN060521
SUB5772273 79318d6b32aeb32d9af2854f02545500	MN060522
SUB5772273 8a4415b75d3d7485443b391eae9585f3	MN060523
SUB5772273 3d18228418f92f984283b9fc63c04f6f	MN060524
SUB5772273 6a03dd4eabffe29f36a7e4304677f8b5	MN060525
SUB5772273 b833c63d961f02cf6460bd9f5e03375a	MN060526
SUB5772273 8bb192f15cfc4cbb5f98612d37d69436	MN060527
SUB5772273 a53190791beb63678ab37619418e1af1	MN060528
SUB5772273 5adae7fcf3e22b7ccb9b100a2329699b	MN060529
SUB5772273 2f0d70b70e794f3329015954710c9602	MN060530
SUB5772273 b50374c3639fe29d80b4765c1c43cd3e	MN060531
SUB5772273 c933ad6b791c43942ed4953c04b41e92	MN060532
SUB5772273 d6d0131655add2ad79e2add36f8414cc	MN060533
SUB5772273 52e363fc7c30c1692a82eb28e56b1e66	MN060534
SUB5772273 d83faf72324708e41e70a280646a423b	MN060535
SUB5772273 6db9996fdf1aa6270480191d852f275d	MN060536
SUB5772273 8578e3d5f12d3f2f04166b44587660ca	MN060537
SUB5772273 e0a8d82e6b860c46c3cd3a86a46091d3	MN060538
SUB5772273 2c5f2e0961eca88b16258ea932360c4a	MN060539
SUB5772273 4cfc73e1ca791ac95d4d17d27c3fcac9	MN060540
SUB5772273 7a61650b2a5cf0f238925ca00709b5c1	MN060541
SUB5772273 a6fa69cec6df8ce971dbbf0b01ed8595	MN060542
SUB5772273 f1a69c0416dad861785f62b77f99be63	MN060543
SUB5772273 3a3d2780ebc2049fbbed50617f2a940a	MN060544
SUB5772273 34360197170dbb2bfcf61bae59ff06d7	MN060545
SUB5772273 404713b2bcc1ae55498fea3e4d9cdf96	MN060546
SUB5772273 74a0af41f714d3dace935851568b8106	MN060547
SUB5772273 c8f0d602484dcc62f49fed43efc4c0df	MN060548
SUB5772273 dfa79afc82d75314e5c8b0323b04c419	MN060549
SUB5772273 f027f5775d9ba71cf01f93a67f0647ce	MN060550
SUB5772273 e7a10d7300892da443530a5e5e148104	MN060551
SUB5772273 3649aa06a767c5273539b750e938b4eb	MN060552
SUB5772273 e0381c6e24d3c3886a12b011f60204c2	MN060553
SUB5772273 a622b3c2b7d34b59aac3c5107256783b	MN060554
SUB5772273 a863592a48cc978644e43386aea92698	MN060555
SUB5772273 73421152449251edf46136ae25914190	MN060556
SUB5772273 349aa64c2652bd409243fbe33cf076cc	MN060557
SUB5772273 264f08361cf376786b5b555325301046	MN060558
SUB5772273 4f21b6260150acf5e99d0205798e41f4	MN060559
SUB5772273 509728fcfd5a680384bda3fe35689cfe	MN060560
SUB5772273 e6bdd9c8c293fc1207780dff0f9c9f36	MN060561
SUB5772273 078fb7e6098c2c911d37b645182a1543	MN060562
SUB5772273 ca3e390c8d9af14b26a711da3ba16c96	MN060563
SUB5772273 467e6bae61658765087ca1e640e1c182	MN060564
SUB5772273 43ef9055b3e999d18e02b4cd0a5ef2b9	MN060565
SUB5772273 69f5565822092418d4b7b82ba0454e2a	MN060566
SUB5772273 1ade2b604aa2ff9628177cd3de470e3b	MN060567
SUB5772273 de6342252b82cb801b0885d39a4f9337	MN060568
SUB5772273 485b9053030dc5d4b41ed5a2c686b031	MN060569
SUB5772273 0821e8d60cc1db53f55922f8b90cf3db	MN060570
SUB5772273 a50f01e87685f28dcf48b16cf502cc83	MN060571
SUB5772273 0da1d9d8ba9ee84d31125d4428977c7b	MN060572
SUB5772273 5f6595bfa0a05a9575f361a1638bf3c5	MN060573
SUB5772273 ee308c33f196626fb9043ef38d52faeb	MN060574
SUB5772273 687ddcfd5723435012ab86a9de1083c0	MN060575
SUB5772273 e5b9d790ee4fa74967b14ba009b8d5c0	MN060576
SUB5772273 03a542bc6c9b1ab88ddba02d970d2558	MN060577
SUB5772273 d74110cadf1ab3f0b9838b7a699cb381	MN060578
SUB5772273 bb251082e1a9880fd2d05bd1cc6391b4	MN060579
SUB5772273 91468d85465cb1557f24b975cd95b9d6	MN060580
SUB5772273 09e292bf5dbd29e8a3a875256bce5a05	MN060581
SUB5772273 6524ef764e352652120aa88fa363f71a	MN060582
SUB5772273 df478c086394ca43f3bb5b9b1cbd6612	MN060583
SUB5772273 410edd687681bd0f6f444101046d47b8	MN060584
SUB5772273 090788457ae163bde28098a0bb94e05d	MN060585
SUB5772273 57f390317eabb9314b981e23dcc6ef10	MN060586
SUB5772273 6ccf4a43c1a399ce0f70dc154b75ae16	MN060587
SUB5772273 294cb29e8f420d824e2d4083640eb567	MN060588
SUB5772273 3e7aba8b2643294caa47a05498bfa929	MN060589
SUB5772273 95428690cdbad99abc3a9d92c76d3175	MN060590
SUB5772273 e4a5ce4ad9a688b3a50498e959d7b752	MN060591
SUB5772273 14e356de87a27951a4c6569391936be2	MN060592
SUB5772273 73db28501ccf4a2a3cd1f18a4e61cc0c	MN060593
SUB5772273 c93e845366c16b8733092e3c0e4a6c9f	MN060594
SUB5772273 db6d936506c1c89719ac9fb64b50fa0d	MN060595
SUB5772273 6918d3b05c505d1e8f565b87d2d71164	MN060596
SUB5772273 2f7cb26dbfee68e56190ee53dc85cb82	MN060597
SUB5772273 2f574b5290499593557822f3ac9e5c50	MN060598
SUB5772273 b05bfb134e67ebb0b8ed8f320a800a9f	MN060599
SUB5772273 897ab207edaa0f269c51cd357c545670	MN060600
SUB5772273 fdafce6bde2b90681c43218847b66d1a	MN060601
SUB5772273 9ee45e0ead04b6e77a3a124ed1e94e86	MN060602
SUB5772273 35be9478cfd59a0ed4972ee17a226bdf	MN060603
SUB5772273 fe39e7b5836980eaf6bd2cc2477012d8	MN060604
SUB5772273 4a97d9a3fbecfd52040f246909111677	MN060605
SUB5772273 09f2ec01f20b94ad1588a3ef597d64a6	MN060606
SUB5772273 e5e4522adba5e6543635f932f2c6c969	MN060607
SUB5772273 b9b4ae4fb0d124123d37435d149b6b36	MN060608
SUB5772273 419d33b2f324df52b423cd17a44634f4	MN060609
SUB5772273 1d9c3ca0640142d6073092e1323e3c65	MN060610
SUB5772273 16111ff804b8e7192a09804ea3c30579	MN060611
SUB5772273 35069b980eddb49f12b7a06eb6bc6533	MN060612
SUB5772273 568a19e234d9e26ad25a7256d1c28318	MN060613
SUB5772273 5849524ba8b8a2062e3b9f7cfad59c55	MN060614
SUB5772273 19cde694af30044ee6c775d4b87811ac	MN060615
SUB5772273 1663e684a030a47e83d4b310b430e8b7	MN060616
SUB5772273 b9e7a37a356617c507348f0ff03a64e1	MN060617
SUB5772273 973b51212d033b755dad7bd0e7e94390	MN060618
SUB5772273 b8698c819b1358e59875d72e6f5947c6	MN060619
SUB5772273 52f7f83868b47e7d1052dd496eed8eec	MN060620
SUB5772273 9c15996cd3ce8d139f4e836711f7fc3e	MN060621
SUB5772273 e444a1df86a375e722c4ef56505068cc	MN060622
SUB5772273 af6f16f4ed4f58f64360444d8f166dfa	MN060623
SUB5772273 4136f50176ef4968a498bd904fcf10c0	MN060624
SUB5772273 08ff6452384248e49d5e813c9e011ce0	MN060625
SUB5772273 4349a5b5358af6a6bc95f73f822e49fe	MN060626
SUB5772273 210a51a05ba2c85e956b00a5bc139fec	MN060627
SUB5772273 47c5b81d409b3163dfb2511a27017219	MN060628
SUB5772273 2a0d6739e95744ce66dbed5da8c9f5c7	MN060629
SUB5772273 f3f72b281e8297f90eb3c164578c2773	MN060630
SUB5772273 bb4b50b175fda1ad8a36954d6863901f	MN060631
SUB5772273 d5a13ac74a64abb5895536c5e352e880	MN060632
SUB5772273 a3e86670d1c03601b2c9f5dabfcfa76a	MN060633
SUB5772273 6f5554f4d30a45ab26a94e89b32a8bbc	MN060634
SUB5772273 cd9460af5f4c51e464fe7343fbbc4a10	MN060635
SUB5772273 e5c8b60174efbfbdf434e02bcb673a63	MN060636
SUB5772273 ba2f483b24f63c40ae1b91629fe1d75d	MN060637
SUB5772273 4648b490e82ca6029fce9dad7d805e48	MN060638
SUB5772273 4f007d130b7ec8d3d9e4ade978bb2d9a	MN060639
SUB5772273 ae2bc93c7c33acc76f88cf4e9f2bdec4	MN060640
SUB5772273 9c771151e61e39d92bf5d81bdcbada65	MN060641
SUB5772273 ed043b6b7d8ff7b048af143096f68cf4	MN060642
SUB5772273 2a6b4298ac5cc7a09632f26ff886fd59	MN060643
SUB5772273 3b8b5015c3129cd48225a1db9d72960d	MN060644
SUB5772273 cf388c5091138f87802797cd450f63b9	MN060645
SUB5772273 97dedb07cc06705bc3c80e4bcd9c717f	MN060646
SUB5772273 c640b0d29ea5ecdfd38a071aa20f00d0	MN060647
SUB5772273 83c5f4d10d1459be78abf0321ff6d34c	MN060648
SUB5772273 c996516ec438456727c7bd211fd0f087	MN060649
SUB5772273 6ce537df2d803c83fd10f1a5641189af	MN060650
SUB5772273 6aca46547f861ea15849bce82a28ffb5	MN060651
SUB5772273 ec22560fbc3d923132bd86fbbad172d8	MN060652
SUB5772273 ef3ed7324d951daf73ad2a9f51adfd95	MN060653
SUB5772273 0b938b2f6f0e6987354d9ec1302067a1	MN060654
SUB5772273 db7ce354c28c5528e2875f994d85bda0	MN060655
SUB5772273 6cdbe2cbef28d601fad92681fe2f44d8	MN060656
SUB5772273 fce011e324e611485cc6f58319b2c626	MN060657
SUB5772273 996bf900ef8cb68534191ec017c3fcba	MN060658
SUB5772273 3e68fd5df2bf0d80d31a79d78e5d9691	MN060659
SUB5772273 6bf4c683dec335bf0671f82e37533f8b	MN060660
SUB5772273 c80d975a9732dc2ae1ec49c2ce2a6c95	MN060661
SUB5772273 5eaaa3ca25a2582ac2b31bef00f65b24	MN060662
SUB5772273 2e44e59c2cb2e863e661de261365fbdc	MN060663
SUB5772273 40db2567ba5d6902cceb8c8a6a11a17e	MN060664
SUB5772273 06200f1fb3cdef8d4342e60d1f8ace48	MN060665
SUB5772273 1a5fe97c3adff8a01469e7b8212fd951	MN060666
SUB5772273 49152ff3d8945398877cf5560e14639a	MN060667
SUB5772273 78a62fd5e5fbb3729e2fd86aa9349b21	MN060668
SUB5772273 3801ed57a37b3718fbba01846f9646b7	MN060669
SUB5772273 1edc4be7d5dfc53c37fd9ddbb0b999df	MN060670
SUB5772273 65820d0195cf59c86d697f4410f1906c	MN060671
SUB5772273 ef23f7e9a67c74632a1d22b9c63351eb	MN060672
SUB5772273 536b3bbad85a637761184478b64fe237	MN060673
SUB5772273 d86fdda0ae3d8e04d73f118de2ab18c9	MN060674
SUB5772273 ad4b5ae830febe4f593975d19d4e9832	MN060675
SUB5772273 eb1b765cf66f3b68646daeec78e44a96	MN060676
SUB5772273 78cb61b7d1537de9cc73222ce03844f5	MN060677
SUB5772273 5ccd83ba621b9b8cf282c484b0d9ddd1	MN060678
SUB5772273 bc060421e9ab0fa9d96c5eb47c30c829	MN060679
SUB5772273 6ab542e6cedb74e13396bb06d15b514b	MN060680
SUB5772273 a0eb60e4d528f2975f663c5159728f55	MN060681
SUB5772273 357b56adbe462805d7c638bc278c2d51	MN060682
SUB5772273 c133b181b2a1e293fbc18512e5312fd2	MN060683
SUB5772273 2bc7db01fd2049e70348130bff5f5e51	MN060684
SUB5772273 c3087f551f48e966118361c8da1bdf58	MN060685
SUB5772273 588be381751338807203a9f43d60b98c	MN060686
SUB5772273 eb4d84f7b2579b1f566c5340ae5a4d1f	MN060687
SUB5772273 edb80ad7f005c124d7ecb829155aae07	MN060688
SUB5772273 a2ad65a85ee278565b511beae43f8fca	MN060689
SUB5772273 dcd0f084b99f0a0d455b8f3506a3fb74	MN060690
SUB5772273 39ff192a6dcd5710d06f6e9e9b2b5942	MN060691
SUB5772273 0044be5a2c2084885b45b9b345bb82c7	MN060692
SUB5772273 3ff8c480f147bb6794574b61e10047cf	MN060693
SUB5772273 6ba5d17d04a19a06fc1e6dd42bcbe5bf	MN060694
SUB5772273 2572cac2fd924788b853de02af25ecb5	MN060695
SUB5772273 74eb08597915398676f390cae29ed586	MN060696
SUB5772273 9cb6f3df6cb45427b56f3a27146a9220	MN060697
SUB5772273 6ecd76b36f37c5516ee0796733a0a700	MN060698
SUB5772273 fe65fe1e271fae5e0b7be85d930ddbe6	MN060699
SUB5772273 a91df79016c5ec57f6ba532355d3e3e4	MN060700
SUB5772273 b3905dce1dc1a4b9a517eeca661e97fc	MN060701
SUB5772273 067d11d5f2f5be3bc15ef5f37842c8ee	MN060702
SUB5772273 45f41cfef813681a9943a04954e103a7	MN060703
SUB5772273 124da573850b32a7f2acaea821262954	MN060704
SUB5772273 1621c7e8373609016df496b8269758d9	MN060705
SUB5772273 bc697cf75a41b53ec2d4f1f7a34b1c3e	MN060706
SUB5772273 74b612d64a5161b56f5b8bcee7296f46	MN060707
SUB5772273 d7cd2a60b8fb6c660b83912234e46e78	MN060708
SUB5772273 f081550b1f4b616684367d5a58c2b3dc	MN060709
SUB5772273 d7b2da5f4c3c4c995f6af0f09560a827	MN060710
SUB5772273 247d2ea571e44cc148e5b017e8e3369d	MN060711
SUB5772273 49aab1ebb1f66776faf96f50c91fc06a	MN060712
SUB5772273 2d13b5333854077aef63cfd9e6bbe274	MN060713
SUB5772273 4458890311b3bac777b8c2caf50a7ba9	MN060714
SUB5772273 d6c2dfaa5474f2ca7656203bb72ec5cc	MN060715
SUB5772273 342a4aaa2eec1c80f0289b64c7015d94	MN060716
SUB5772273 5551bb761e4dcbf1d67cf1c3766fb9cb	MN060717
SUB5772273 0299f095ed38aa40d26cc8d246762889	MN060718
SUB5772273 d2c124000b30b363ee738ade11d8b357	MN060719
SUB5772273 77ac9abc6670d7628789f50adbe37a37	MN060720
SUB5772273 7200e0d04816967433f333262066c1d8	MN060721
SUB5772273 91d4ba5fc0b8af026156c56c2e91d84d	MN060722
SUB5772273 12d9fdac156a2916bbb961b91472b75d	MN060723
SUB5772273 f4a129b2f16568f290c53590977312bd	MN060724
SUB5772273 c26238a989571a834f211234b25f3db0	MN060725
SUB5772273 b028055b3d10d2cf8a0a8fd1bfc5bba5	MN060726
SUB5772273 05639804ce4a244b94eab904c5ff53c2	MN060727
SUB5772273 9843a7c1e78e40f2c1da8d718fbdc5ba	MN060728
SUB5772273 7551098944028692185d5efee68f9bd2	MN060729
SUB5772273 a8963b122cfe9dfd6960577afba8c175	MN060730
SUB5772273 36cc58d8984b189aa94507865fb006d0	MN060731
SUB5772273 2692cfb47968d4969cf6669ec7e01bf7	MN060732
SUB5772273 1fce98560eb50d9c2a0f993feff59ca3	MN060733
SUB5772273 a94ea604737abeb94002174d4f540d2d	MN060734
SUB5772273 50373baa09aa064c8d4ce7c61409be83	MN060735
SUB5772273 cb10736a68036543825fb3c64b0ee626	MN060736
SUB5772273 d2a81043e4bbce7ff79a6af6176ff5e2	MN060737
SUB5772273 3f2e6c673dfb1a94ddf5446ca9472d64	MN060738
SUB5772273 aeba372d5f87cd1627dcd4df9066f6f0	MN060739
SUB5772273 013302f4f0e251b0ca9b27f9d6f9499b	MN060740
SUB5772273 826c3769b6a3e1ad06897315efe76963	MN060741
SUB5772273 f54ffdcca5c6911623522b60452679ee	MN060742
SUB5772273 55b862c79801a4f2af19be7db5bb8d8a	MN060743
SUB5772273 e3d775efe62d56a9fc2b10dafaa08f2b	MN060744
SUB5772273 f31257e05bc4d62efd520434413893af	MN060745
SUB5772273 7b3942d959b07ccf39ffff343d7bd537	MN060746
SUB5772273 9f2c2667575e7363255c2e19b3266b16	MN060747
SUB5772273 0a38d4d75376da360593b5b235f6ca7f	MN060748
SUB5772273 5ff6f33a2ecbed41658e12317e7f90c6	MN060749
SUB5772273 723feca8d44faec3433e1cd43a79d991	MN060750
SUB5772273 f79f60d7abe595524bd4a03f61ebed18	MN060751
SUB5772273 e193db87837e0662b4fd4de2da654cd9	MN060752
SUB5772273 4feddf41b30b3e9e3eed8811fa009c13	MN060753
SUB5772273 733f85459c33618ed884a2def469209a	MN060754
SUB5772273 c8c8c2e06d42ed9e030c590f7d83b241	MN060755
SUB5772273 88313ba1a79ee8e9efdc6ba0a3726257	MN060756
SUB5772273 d4971e8b0f588ec1f05f6bf47a170b5d	MN060757
SUB5772273 2e0e5a0cfff7abfb4f34bc57bddf8368	MN060758
SUB5772273 ff81959ded5f7b277b67becfac31823b	MN060759
SUB5772273 3016e1ae86fc9eff41f53d83e2b05c86	MN060760
SUB5772273 d523898efad2cb465488c9cca49beca8	MN060761
SUB5772273 719923d90e44404904e3f28656a6bdf8	MN060762
SUB5772273 19489ebf8ebcc29bed7907d3dc9e899f	MN060763
SUB5772273 0ae3054b56b71c737fc5dbaedf49f547	MN060764
SUB5772273 0b39548f39bb84cfe9785b4b25f49a55	MN060765
SUB5772273 08df4e020c61c4afb4ea26a0ce4e9dad	MN060766
SUB5772273 50ffbe1e2c2e30ef498711b014429b9f	MN060767
SUB5772273 db391daca4c8d7c29e0b47677899fd77	MN060768
SUB5772273 cfce41fc4f09f03611e52192ee004290	MN060769
SUB5772273 10c83eaf83ae029da332c0b34a0c7147	MN060770
SUB5772273 c999410fa05bed9e4b11ea220105fdbd	MN060771
SUB5772273 e40ddc934206f925eb1a21dba5b46a4e	MN060772
SUB5772273 b784beb5526bac45287c6202c51a0556	MN060773
SUB5772273 23d4feeb8730cf1835d6242da422fde9	MN060774
SUB5772273 6c4266b34d25bde9771272a9c8af42ca	MN060775
SUB5772273 6797d169cfec05e2708a84465d111b8d	MN060776
SUB5772273 1f3ecfd82e10ed7ff260a032424d9f74	MN060777
SUB5772273 1c699958d2d14d70c071b8af012c3700	MN060778
SUB5772273 ffc58b3c8e96c05dd98152c4e1903810	MN060779
SUB5772273 55c3a648be03d2739d57049a5231c5bd	MN060780
SUB5772273 6199a396df6c5d94a79d90b26856e903	MN060781
SUB5772273 96c9a93297f06cdecb70a5e428f1c8f8	MN060782
SUB5772273 e790e00dbbbded8c47b86de3ffa181d3	MN060783
SUB5772273 9415a5eb9c3ae4ef160862d3ced34238	MN060784
SUB5772273 f250dc9c70ea2904cde67a15dcb5fe08	MN060785
SUB5772273 7e2c164e4dc3bc8613fe20bf5a7396f0	MN060786
SUB5772273 705fa08cabc108a55eac27f90c56a076	MN060787
SUB5772273 5276a605a7de3209f5d4afdb0d0092e8	MN060788
SUB5772273 2a468b39e5d30f6537d0e4802944a55f	MN060789
SUB5772273 004a3c0989c266879b5a20177ec9c237	MN060790
SUB5772273 62f6f598a183e71d8fdb66422bb31c81	MN060791
SUB5772273 a3d568ea3a237efedf79f3a96f9a2349	MN060792
SUB5772273 dc9e4a3b7cde653565cdf963bfc45499	MN060793
SUB5772273 c7cb99dcc7d088760a6edca9132b764a	MN060794
SUB5772273 6bef99e6eb3e8e836b744a80bf34a36b	MN060795
SUB5772273 6f539d4378bcce8e75b009cca4743e7d	MN060796
SUB5772273 a61e42940fae838cb31f8725c1b89b6b	MN060797
SUB5772273 a4362d74ffe005e289be5bf0d435cce8	MN060798
SUB5772273 aad7e065228415f9c014182a446eb0e1	MN060799
SUB5772273 dcbcaec7626fde5ef9a7f2e246051329	MN060800
SUB5772273 b701f336fd546f519707d3cc21955d18	MN060801
SUB5772273 ce4038dddebe2d1f14d489a1415c2bdb	MN060802
SUB5772273 3c59dc4054dfbe6a2209e5746bf8fc35	MN060803
SUB5772273 0885b09547a6a07e5aa6b367577e9077	MN060804
SUB5772273 f5200e7823b36dff186e66849acb0641	MN060805
SUB5772273 abe7063b68d37e51acea0884615183f2	MN060806
SUB5772273 e89f89b918de1c01eb5bd5572e157c11	MN060807
SUB5772273 40275af5d1341d8f8553d753556f9cbb	MN060808
SUB5772273 94202f702d8b70e1ba558e61fe815c90	MN060809
SUB5772273 448853569fddbf921ccfc5952fa3c722	MN060810
SUB5772273 b3cd4adaacb387db4fa4c2e801820d37	MN060811
SUB5772273 6da960c01d133b9092a3b59e09e28ad6	MN060812
SUB5772273 18d514908f06c7d90d6bf69619bdb2b7	MN060813
SUB5772273 b2f28853117c61914b9cb08ace41ec1e	MN060814
SUB5772273 302adb9e0349839b86c041f7d47374b2	MN060815
SUB5772273 195b5f923445426b83d6a8488ce0bf47	MN060816
SUB5772273 49464a1eb01d75f3e3389de78cb1a0e6	MN060817
SUB5772273 1582028ce6bdffebfb7440330a4cb850	MN060818
SUB5772273 eb26d339fb5d71c508c0d8f0533b7560	MN060819
SUB5772273 b763204d70e9a0cbbd7712b3b719c0c0	MN060820
SUB5772273 5f471c4b3eb0f6cf25fcc4236a5b1113	MN060821
SUB5772273 fd56b5fc257be0162f66da2fb177facd	MN060822
SUB5772273 e36c35b023ac5dc30b6f49b538693407	MN060823
SUB5772273 0400c092ccd7efa8223ea6c057709038	MN060824
SUB5772273 329417080a190289dac162a279615ecd	MN060825
SUB5772273 1f41cd27f4d858b1249501d961b881bc	MN060826
SUB5772273 84efbae52055db5911687d15efdeff43	MN060827
SUB5772273 05ba53aa8f7fb1d5d2cb02ab443d7493	MN060828
SUB5772273 41be69206bdc5e2da721714ad3f2b1ab	MN060829
SUB5772273 5bc58fb79e62624fbe81725b685ad05d	MN060830
SUB5772273 d0b072cbd161c04a8200d0fecebf10b6	MN060831
SUB5772273 c0b9e0778027905c18c8c8b62b2d7ff8	MN060832
SUB5772273 0c9c60e02bdd5c643a42827e5ccceb7b	MN060833
SUB5772273 af8cba7c9528367dc68f22d64f69119f	MN060834
SUB5772273 833cc52d9337c96d8a4ba7b8d47f159e	MN060835
SUB5772273 355253881d2c8dc3df01e241a5b6820a	MN060836
SUB5772273 89288a1983cbf1c13037e4ea15f64d86	MN060837
SUB5772273 0bf60c154c06b50ec1bcc5015b4fc79e	MN060838
SUB5772273 68dde486eda1a02d0fe55b9bb16a3cb4	MN060839
SUB5772273 c40e6e9e325cedff69a809ed2850031c	MN060840
SUB5772273 5c002e636aff0b22db7db2979a2f5c9f	MN060841
SUB5772273 35f0ab79a9b136682b26ef99a5d73aea	MN060842
SUB5772273 b52826fc82c7cf78b595d39a8ad3db7a	MN060843
SUB5772273 4daba44770e75d9798287d8b5b2860d9	MN060844
SUB5772273 cd4e03de4dee3132e2eb34bdbe821a56	MN060845
SUB5772273 d2f8027d1834d31ba7312600e7116a56	MN060846
SUB5772273 8d53f64163d92e1285a7fc40d284b21b	MN060847
SUB5772273 4dead4e2baaa7826dac8cf36c4702d02	MN060848
SUB5772273 bb8c0fae72097bce1cc1df4054237774	MN060849
SUB5772273 0fb0f79a64502da831f8c99f8126ddcd	MN060850
SUB5772273 70e4a041183396fabed072cdc014ac25	MN060851
SUB5772273 c83f4f4d61e008b2aac34e5fd94db66f	MN060852
SUB5772273 3a3daad12c3c1c545bacecbadd4bda41	MN060853
SUB5772273 582a1dc9368178f98938a8956a475ea8	MN060854
SUB5772273 e39f3a84edb8d6eddcdd23363c87a61b	MN060855
SUB5772273 c9310e1851bed2b460ba37522fceff56	MN060856
SUB5772273 8bc6f8d4050974aaa0bbca51b54f2536	MN060857
SUB5772273 8bb4103653c4c48edcc59e6cc35a1e91	MN060858
SUB5772273 3af511862a82f2479a6d524438cde720	MN060859
SUB5772273 098c406131c46dbc0baf86ab4c4ab52a	MN060860
SUB5772273 2139e7ad4f3c9b3bc736f8ecc09a9ae3	MN060861
SUB5772273 5116773ae7615fa10fd20ab30b2c331d	MN060862
SUB5772273 9fdebe9a545d4205c7b6bcd11dd98be5	MN060863
SUB5772273 386ec85e759995e08d2313cfc7a16f34	MN060864
SUB5772273 cfbe4cf4cd685f0c1a96465d49361ec4	MN060865
SUB5772273 96d76982baf97856d91877f9e95229f0	MN060866
SUB5772273 2a5720e2b1f2b6cdde4957327cd3cc0b	MN060867
SUB5772273 5a8285436013d45095021c8412d5b702	MN060868
SUB5772273 37115f699690b1d2d4aceefd20edaf4b	MN060869
SUB5772273 021ef16e9f7c37ba41c43f7d758add98	MN060870
SUB5772273 6447221bc47a9c15ac8911b5fbd8201c	MN060871
SUB5772273 89e6a586a473e1df1f8af65cad035f0e	MN060872
SUB5772273 dd1adc6a4ebe2d5f1471e03b681dfb38	MN060873
SUB5772273 a8f676d7157a050fbd53bfc952a0d3a2	MN060874
SUB5772273 660cc7680b2efcfbfc4fb28d041a60d4	MN060875
SUB5772273 39388552c1474b3401e2b50199bee971	MN060876
SUB5772273 0dd35159fb927930a64694151f28e736	MN060877
SUB5772273 67c13d41ba7393901f140059436e3f13	MN060878
SUB5772273 624ee70c6cca96399cb8cebe2aec8856	MN060879
SUB5772273 e879562f1d0771ce43de06f8b05431f0	MN060880
SUB5772273 229cc300014b203fdee097eff5dc0ae6	MN060881
SUB5772273 3f59a8b4750a4a47e88c07d5f80cfc67	MN060882
SUB5772273 a706e8c9e5fdaafb9947d48571d1c6c0	MN060883
SUB5772273 eda9f735ca62391356191d7544f51265	MN060884
SUB5772273 ae67369f05b57957ad4599cf791721f5	MN060885
SUB5772273 a5ee1e5efca7640ab29258d5a97c3c56	MN060886
SUB5772273 19d13bc4392fc6d52b29e46499ef34ba	MN060887
SUB5772273 6d4e15658a01209e3d7261be1cc20d56	MN060888
SUB5772273 b611982741b885d3b5ae75bf9ac86c13	MN060889
SUB5772273 b1a707471c2aa2faa0b05e363484f881	MN060890
SUB5772273 722c4458d4fdbdec511292d6d2617fc9	MN060891
SUB5772273 77128654a7d0721ce0aad8058ff8155a	MN060892
SUB5772273 2ad732dab634514606d7e6288356edd0	MN060893
SUB5772273 971a4faee3d3faa5003ca4d18f9127c3	MN060894
SUB5772273 3cb68ff05260e9438e0505287213e897	MN060895
SUB5772273 e4b6e02b5ae0bb41ea868fb4f6b9ad41	MN060896
SUB5772273 be3d0557fc988dd60f414a98b212da09	MN060897
SUB5772273 d37a03a6f3a78db2dc9934a7fa1a0e54	MN060898
SUB5772273 d5d4bd165ebc772ce8203bf4964f2b23	MN060899
SUB5772273 8c97d64f7a72fd02dc3e8588ce856041	MN060900
SUB5772273 39bd8ab23f81b8e411821c9e875234cc	MN060901
SUB5772273 23de26efd2ae7d179a24cb75de724b6a	MN060902
SUB5772273 1cca40be5e31e27897f22631562f12fc	MN060903
SUB5772273 b76b3fa22ac0fe02aaa2ef3b2e7a11ca	MN060904
SUB5772273 eff7deefcc5c23f16073eb6787652dfd	MN060905
SUB5772273 3710662a6ad9764bf37d8cc04e6ab8f1	MN060906
SUB5772273 710e7fe84480a7e88ab686bfaf18b15d	MN060907
SUB5772273 2ab20981b43f004838594e76414e0c47	MN060908
SUB5772273 af4c17c19f44869b4cfdb0f160cc8bad	MN060909
SUB5772273 ac35daf8aa7f3c8a23214ffa1c5d694b	MN060910
SUB5772273 745a9cea5463bd628a141e7bd6bde39b	MN060911
SUB5772273 85a2f9dbf4d78455ff54d77a4f032361	MN060912
SUB5772273 9d4d592d3baed5e38678ad2e9410359f	MN060913
SUB5772273 59d715a11c90180772afba895a73ed87	MN060914
SUB5772273 f2e23f3df2aa93f2f0fe35f4941dcf6b	MN060915
SUB5772273 9de384654a77c78eca3fa0c176b48e70	MN060916
SUB5772273 26fff0d0d22c5374a2585cee7bc17d04	MN060917
SUB5772273 04db903804b2820bc1d2b76e2d00d4ca	MN060918
SUB5772273 886e6fabbce573a3e6ec530d1ee9d8f6	MN060919
SUB5772273 107f5609fc34bb0f426f8d3f0380fb12	MN060920
SUB5772273 3c65dfd4a780a340b503e2619f4d16c9	MN060921
SUB5772273 8a32230e70b06cb3cafe4644b6e3bf87	MN060922
SUB5772273 bcd124132a2addc8acb45264d6cc55e5	MN060923
SUB5772273 e95214b5ee95b1692ed34564a553b773	MN060924
SUB5772273 e10ee1f0661da4f96ab14d373c0180ea	MN060925
SUB5772273 d96d9b4388b6e012b25481412682cf5d	MN060926
SUB5772273 5fc6d92917d2dc849b9ba27d6b2e752a	MN060927
SUB5772273 fba903e5ee76f22042c0705d80070033	MN060928
SUB5772273 9e3ccfab7898dd0e0609a7bde71ea47d	MN060929
SUB5772273 4123d861459610ee218b8d3ac33a6927	MN060930
SUB5772273 165bebaaefb5c1dae526f30a909ad027	MN060931
SUB5772273 ee0b8cdad6473d5c866a4885dba02325	MN060932
SUB5772273 c6712c075c0531f7b03f12ef652a2ee2	MN060933
SUB5772273 0738dc14fd69fc525f8259f97c00736b	MN060934
SUB5772273 c7487f108ef5de316ccece895e28bfb3	MN060935
SUB5772273 56c3dba7be84287140df519a02f2f95e	MN060936
SUB5772273 7f6c9de5002c48922f9a96d8acc878c9	MN060937
SUB5772273 8c9dfaaecc4a169227680c6da46887da	MN060938
SUB5772273 214373d83e381b63d14d15ab26046d15	MN060939
SUB5772273 e69069cfd8209f61236e41d34f5a47ef	MN060940
SUB5772273 faa8d8e97421fa8c01567aaf03bfb66f	MN060941
SUB5772273 b0775632ba7795fde70e2a35827621d9	MN060942
SUB5772273 b9e81d42d3538ac7435b7e4df0f8402a	MN060943
SUB5772273 6fdd0f7176e70a429a19958421155e48	MN060944
SUB5772273 952976f0fea99dbd9ec5b02b9ec4fc1f	MN060945
SUB5772273 cb8820e8683f5e5b08e9c8a322187896	MN060946
SUB5772273 e6fb07a2f2c1d46cc99e772fe172aea1	MN060947
SUB5772273 b578ca329d51aee90b78ab05fb4a2dc4	MN060948
SUB5772273 a8350791a72b03cbc4b61de54e7880fa	MN060949
SUB5772273 f4d109110055903570fb168b0e68ee75	MN060950
SUB5772273 087f9087fdae4515462d25a412409383	MN060951
SUB5772273 c36addf05cb82aded8c798924163ca02	MN060952
SUB5772273 80a3464258a079a8a44660de57fe7e53	MN060953
SUB5772273 56a4df9cdea3a441a0b99a42ab2331c3	MN060954
SUB5772273 f8732fa734b38abb0288d9233e94d1d0	MN060955
SUB5772273 9faf481b900df10467812b00cc427d9b	MN060956
SUB5772273 3008c69042d3ed4444f8b47b1bb18dad	MN060957
SUB5772273 c41fb887e32808a49feceb03b934fe0d	MN060958
SUB5772273 be56a52c5efe250fdd8a7d37cb02045c	MN060959
SUB5772273 7f36fb5c5ed7c694e9ab3ee3515864a2	MN060960
SUB5772273 fb3d32c7e4911e1dee411b459a8835d9	MN060961
SUB5772273 d6c7a1710ba2359a7fbe2d9319b0a0bd	MN060962
SUB5772273 54a56b5e3f03114f383bd2218952e258	MN060963
SUB5772273 8a4b02f0dce5dac3ba307bc00e7f1a14	MN060964
SUB5772273 045984f0c623401125a0a54a49bf8457	MN060965
SUB5772273 3f9ab16bd9402e90244a79b45e7faf0b	MN060966
SUB5772273 bba7b1c7cfcc2212ceafb1d5c62e8ff8	MN060967
SUB5772273 19af3dbd318e2319b3467d103d193632	MN060968
